# Supplementary material for: Diagnostic and Therapeutic Approach to Children and Adolescents with Obstructive Sleep Apnea Syndrome (OSA): Recommendations in Emilia-Romagna Region, Italy
Source: MDPI journal article supplement (doi:10.3390/life12050739), 2022-05-16
Supplement: s1 [file s1]

Supplementary material S2

|                                                                                                |               |       |        |              |            |        |
|------------------------------------------------------------------------------------------------|---------------|-------|--------|--------------|------------|--------|
| Surname                                                                                        |               |       |        | Name         |            |        |
| Teenager<br>STOP-BANG                                                                          |               |       |        |              |            |        |
|                                                                                                |               |       |        |              |            |        |
| <b>S</b> nooring (How often do you snore loudly? )                                             | I do not know | NEVER | Rarely | Occasionally | Frequently | Always |
| <b>T</b> ired (Feels tired during the day (daytime tiredness))                                 | I do not know | NEVER | Rarely | Occasionally | Frequently | Always |
| <b>O</b> bserved apnoea (How often did you observe pauses in breathing in their sleep)         | I do not know | NEVER | Rarely | Occasionally | Frequently | Always |
| <b>P</b> ressure (systolic or diastolic p.p. $\geq$ 95 percentile for age and height)          | I do not know | NEVER | Rarely | Occasionally | Frequently | Always |
| <b>B</b> MI (greater than or equal to the 95 percentiles for age and height)                   | S<br>I        |       |        | N<br>O       |            |        |
| <b>A</b> cademic problems (learning/scholastic problems)                                       | I do not know | NEVER | Rarely | Occasionally | Frequently | Always |
| <b>N</b> eck circumference (neck circumconferenece $\geq$ of 95 percentile for age and height) | S<br>I        |       |        | N<br>O       |            |        |
| <b>G</b> ender (Male)                                                                          | S<br>I        |       |        | N<br>O       |            |        |
|                                                                                                |               |       |        |              |            |        |
| Score:<br>Response Ratio/Total answers (8) ><br>(Pathological $\geq$ 4)                        |               |       |        |              |            |        |

Combs D et al 2015 [11]
