# Supplementary material for: Diagnostic and Therapeutic Approach to Children and Adolescents with Obstructive Sleep Apnea Syndrome (OSA): Recommendations in Emilia-Romagna Region, Italy
Source: MDPI journal article supplement (doi:10.3390/life12050739), 2022-05-16
Supplement: s1 [file s1]

# Supplementary Material S1

| Surname                                                                             | Name |    |        |
|-------------------------------------------------------------------------------------|------|----|--------|
| <b>PAEDIATRIC SLEEP QUESTIONNAIRE-<br/>SCREENING QUESTIONNAIRE FOR OSA</b>          |      |    |        |
| <b>1) The child during sleep:</b>                                                   |      |    |        |
| Always snores                                                                       | YES  | NO | NOT SO |
| She snores at least half the night                                                  | YES  | NO | NOT SO |
| Snoring noisily                                                                     | YES  | NO | NOT SO |
| Breathing 'heavily' or noisily                                                      | YES  | NO | NOT SO |
| Presents breathing difficulties                                                     | YES  | NO | NOT SO |
| <b>2) The child stops breathing during sleep.</b>                                   |      |    |        |
|                                                                                     | YES  | NO | NOT SO |
| <b>3) The child:</b>                                                                |      |    |        |
| Breathe with your mouth open during the day                                         | YES  | NO | NOT SO |
| Presents with dry mouth on awakening                                                | YES  | NO | NOT SO |
| Presents enuresis                                                                   | YES  | NO | NOT SO |
| <b>4) The child:</b>                                                                |      |    |        |
|                                                                                     | YES  | NO | NOT SO |
| He wakes up tired                                                                   | YES  | NO | NOT SO |
| Appears sleepy during the day                                                       | YES  | NO | NOT SO |
| <b>5) Has the teacher ever told you that you appear drowsy:</b>                     |      |    |        |
|                                                                                     | YES  | NO | NOT SO |
| <b>6) Wakes up with difficulty in the morning:</b>                                  |      |    |        |
|                                                                                     | YES  | NO | NOT SO |
| <b>7) Wakes up complaining of headache:</b>                                         |      |    |        |
|                                                                                     | YES  | NO | NOT SO |
| <b>8) It has shown a slowdown in growth:</b>                                        |      |    |        |
|                                                                                     | YES  | NO | NOT SO |
| <b>9) He is overweight:</b>                                                         |      |    |        |
|                                                                                     | YES  | NO | NOT SO |
| <b>10) Often the child:</b>                                                         |      |    |        |
|                                                                                     | YES  | NO | NOT SO |
| Seems not to listen                                                                 | YES  | NO | NOT SO |
| Easily distracted                                                                   | YES  | NO | NOT SO |
| He has difficulty in doing his homework                                             | YES  | NO | NOT SO |
| He is agitated when sitting                                                         | YES  | NO | NOT SO |
| Interrupts adult conversations                                                      | YES  | NO | NOT SO |
| He is so agitated that he seems 'spring-loaded'.                                    | YES  | NO | NOT SO |
| <b>Score: YES = 1 NO = 0</b>                                                        |      |    |        |
| <b>Ratio of Positive Responses/Total Responses (22) &gt; 0.33 = Out of Standard</b> |      |    |        |

Chervin R.D et al 2000 [10].
